# Supplementary material for: Prevalence, Molecular Characterization, and Ecological Associations of Filarioid Helminths in a Wild Population of Blue Tits (Cyanistes caeruleus)
Source: MDPI journal article supplement (doi:10.3390/d15050609), 2023-04-29
Supplement: s1 [file s1]

Phylogenetic tree of the order Siphonophora, showing relationships between various genera and species. The tree is rooted at the bottom left and branches out to the right. Bootstrap values are provided at many nodes. The tree is color-coded: Cercothirillaria (green), Cruoriiflaria (blue), Litomosoides (red), Litomosa (orange), Yatesia (purple), Splendofilaria (pink), Eufilaria (light blue), Mansonella (light green), Pelecitus (light orange), Foleyella (light purple), Aprostella (light pink), Chanderella (light blue), Madathamugadia (light green), Micipsella (light orange), Rumeniflaria (light purple), Cardiofilaria (light pink), Onchocerca (light blue), Acanthocheilonema (light green), Dipetalonema (light orange), Dirofilaria (light purple), Breinlia (light pink), Brugia (light blue), Wuchereria (light green), Dipetalonema (light orange), and Neofoleyellides (light purple).

Key taxa and species shown include:

- Cercothirillaria**: XK898456 *Cercothirillaria binae*, KP270686 *Cercothirillaria tuberculosa*, KP760176 *Cruoriiflaria tuberculosa*.
- Cruoriiflaria**: AJ271615 *Litomosoides sigmodontis*, AJ544870 *Litomosoides galizai*, MW465769 *Litomosoides esslingeri*, MW465776 *Litomosoides scotti*, MW465775 *Litomosoides odiae*, AJ544869 *Litomosoides yutajensis*, KP760192 *Litomosoides hamletti*, KP760193 *Litomosoides solarii*, KP728057 *Litomosoides* sp., KP728027 *Litomosa* sp., KP728069 *Litomosa* sp., KP728059 *Litomosa* sp., KP728072 *Litomosa* sp., MH411205 *Litomosa* sp., OP796368 *Litomosa vaucheri*, KP760210 *Yatesia hydrochoerus*.
- Litomosoides**: KP760192 *Litomosoides hamletti*, KP760193 *Litomosoides solarii*, KP728057 *Litomosoides* sp., KP728027 *Litomosa* sp., KP728069 *Litomosa* sp., KP728059 *Litomosa* sp., KP728072 *Litomosa* sp., MH411205 *Litomosa* sp., OP796368 *Litomosa vaucheri*, KP760210 *Yatesia hydrochoerus*.
- Litomosa**: KP760192 *Litomosoides hamletti*, KP760193 *Litomosoides solarii*, KP728057 *Litomosoides* sp., KP728027 *Litomosa* sp., KP728069 *Litomosa* sp., KP728059 *Litomosa* sp., KP728072 *Litomosa* sp., MH411205 *Litomosa* sp., OP796368 *Litomosa vaucheri*, KP760210 *Yatesia hydrochoerus*.
- Yatesia**: KP760210 *Yatesia hydrochoerus*.
- Splendofilaria**: Cc39, Cc139 *Splendofilaria mavis* *Cyanistes caeruleus*, OK631737, OK631738 *Splendofilaria mavis* *Turdus merula*, OK631739, OK631740 *Splendofilaria mavis* *Turdus philomelos*, MK424345 *Onchocerca* sp. *Mareca falcata*, MT800764, MT800765 *Splendofilaria bartlettii* *Sylvia atricapilla*, Cc56, Cc115 *Splendofilaria* sp. *Cyanistes caeruleus*, Cc95 *Splendofilaria* sp. *Cyanistes caeruleus*, Cc17 *Splendofilaria* sp. *Cyanistes caeruleus*, MT800766 *Eufilaria acrocephalus* *Acrocephalus scirpaceus*, MT800769 *Eufilaria acrocephalus* *Acrocephalus scirpaceus*, MT800768 *Eufilaria acrocephalus* *Acrocephalus scirpaceus*, MT800767 *Eufilaria* sp. *Acrocephalus arundinaceus*, MT800770 *Eufilaria sylviae* *Sylvia borin*, MT800771 *Eufilaria sylviae* *Sylvia borin*, KP760195 *Mansonella ozzardi*, KP760206 *Pelecitus fulicae* *Podiceps nigricollis*, NF471845 *Eulimdana clava* *Columba livia domestica*, FR823332 *Aprostella* sp. *Turdus rufiventris*, HM773029 *Chanderella quiscalis* *Quiscalus quiscula*, JQ888262 *Madathamugadia hieperi* *Pachyactylus turneri*, Cc53, Cc106 *Onchocercidae* *Cyanistes caeruleus*, MW934617 *Micipsella iberica* *Lepus granatensis*, JQ888273 *Rumeniflaria andersoni* *Rangifer tarandus*.
- Eufilaria**: MT800766 *Eufilaria acrocephalus* *Acrocephalus scirpaceus*, MT800769 *Eufilaria acrocephalus* *Acrocephalus scirpaceus*, MT800768 *Eufilaria acrocephalus* *Acrocephalus scirpaceus*, MT800767 *Eufilaria* sp. *Acrocephalus arundinaceus*, MT800770 *Eufilaria sylviae* *Sylvia borin*, MT800771 *Eufilaria sylviae* *Sylvia borin*.
- Mansonella**: KP760195 *Mansonella ozzardi*, KP760206 *Pelecitus fulicae* *Podiceps nigricollis*, NF471845 *Eulimdana clava* *Columba livia domestica*, FR823332 *Aprostella* sp. *Turdus rufiventris*, HM773029 *Chanderella quiscalis* *Quiscalus quiscula*, JQ888262 *Madathamugadia hieperi* *Pachyactylus turneri*, Cc53, Cc106 *Onchocercidae* *Cyanistes caeruleus*, MW934617 *Micipsella iberica* *Lepus granatensis*, JQ888273 *Rumeniflaria andersoni* *Rangifer tarandus*.
- Pelecitus**: KP760195 *Mansonella ozzardi*, KP760206 *Pelecitus fulicae* *Podiceps nigricollis*, NF471845 *Eulimdana clava* *Columba livia domestica*, FR823332 *Aprostella* sp. *Turdus rufiventris*, HM773029 *Chanderella quiscalis* *Quiscalus quiscula*, JQ888262 *Madathamugadia hieperi* *Pachyactylus turneri*, Cc53, Cc106 *Onchocercidae* *Cyanistes caeruleus*, MW934617 *Micipsella iberica* *Lepus granatensis*, JQ888273 *Rumeniflaria andersoni* *Rangifer tarandus*.
- Foleyella**: KP760195 *Mansonella ozzardi*, KP760206 *Pelecitus fulicae* *Podiceps nigricollis*, NF471845 *Eulimdana clava* *Columba livia domestica*, FR823332 *Aprostella* sp. *Turdus rufiventris*, HM773029 *Chanderella quiscalis* *Quiscalus quiscula*, JQ888262 *Madathamugadia hieperi* *Pachyactylus turneri*, Cc53, Cc106 *Onchocercidae* *Cyanistes caeruleus*, MW934617 *Micipsella iberica* *Lepus granatensis*, JQ888273 *Rumeniflaria andersoni* *Rangifer tarandus*.
- Aprostella**: FR823332 *Aprostella* sp. *Turdus rufiventris*, HM773029 *Chanderella quiscalis* *Quiscalus quiscula*, JQ888262 *Madathamugadia hieperi* *Pachyactylus turneri*, Cc53, Cc106 *Onchocercidae* *Cyanistes caeruleus*, MW934617 *Micipsella iberica* *Lepus granatensis*, JQ888273 *Rumeniflaria andersoni* *Rangifer tarandus*.
- Chanderella**: HM773029 *Chanderella quiscalis* *Quiscalus quiscula*, JQ888262 *Madathamugadia hieperi* *Pachyactylus turneri*, Cc53, Cc106 *Onchocercidae* *Cyanistes caeruleus*, MW934617 *Micipsella iberica* *Lepus granatensis*, JQ888273 *Rumeniflaria andersoni* *Rangifer tarandus*.
- Madathamugadia**: JQ888262 *Madathamugadia hieperi* *Pachyactylus turneri*, Cc53, Cc106 *Onchocercidae* *Cyanistes caeruleus*, MW934617 *Micipsella iberica* *Lepus granatensis*, JQ888273 *Rumeniflaria andersoni* *Rangifer tarandus*.
- Micipsella**: MW934617 *Micipsella iberica* *Lepus granatensis*, JQ888273 *Rumeniflaria andersoni* *Rangifer tarandus*.
- Rumeniflaria**: JQ888273 *Rumeniflaria andersoni* *Rangifer tarandus*.
- Cardiofilaria**: KP760174 *Cardiofilaria pavlovskii*, AB518692 *Onchocerca japonica*, AB518693 *Onchocerca* sp., KC167356 *Onchocerca ramachandrinii*, ON854650 *Onchocerca skrjabini*, MK541848 *Onchocerca* sp., XK853323 *Onchocerca boehmi*, MT262500 *Onchocerca* sp., XK853324 *Onchocerca cervipedis*, KC167355 *Onchocerca volvulus*, XK181290 *Onchocerca ochengi*, KC167352 *Onchocerca* sp., XK853326 *Onchocerca lienalis*, KT001213 *Onchocerca jakutensis*, MG188678 *Onchocerca fasciata*, XK853325 *Onchocerca lienalis*, AJ271616 *Onchocerca gilsoni*, KP760201 *On*

1
